# Supplementary material for: Mitochondrial fusion is frequent in skeletal muscle and supports excitation–contraction coupling
Source: PubMed Central journal article supplement — J Cell Biol. 2014 Apr 28;205(2):179–95. doi: 10.1083/jcb.201312066 (PMC4003250; doi:10.1083/jcb.201312066), 2014-04-28
Supplement: supp_jcb.201312066_JCB_201312066_sm.pdf [file supp_jcb.201312066_JCB_201312066_sm.pdf]

Eisner et al., <http://www.jcb.org/cgi/content/full/jcb.201312066/DC1>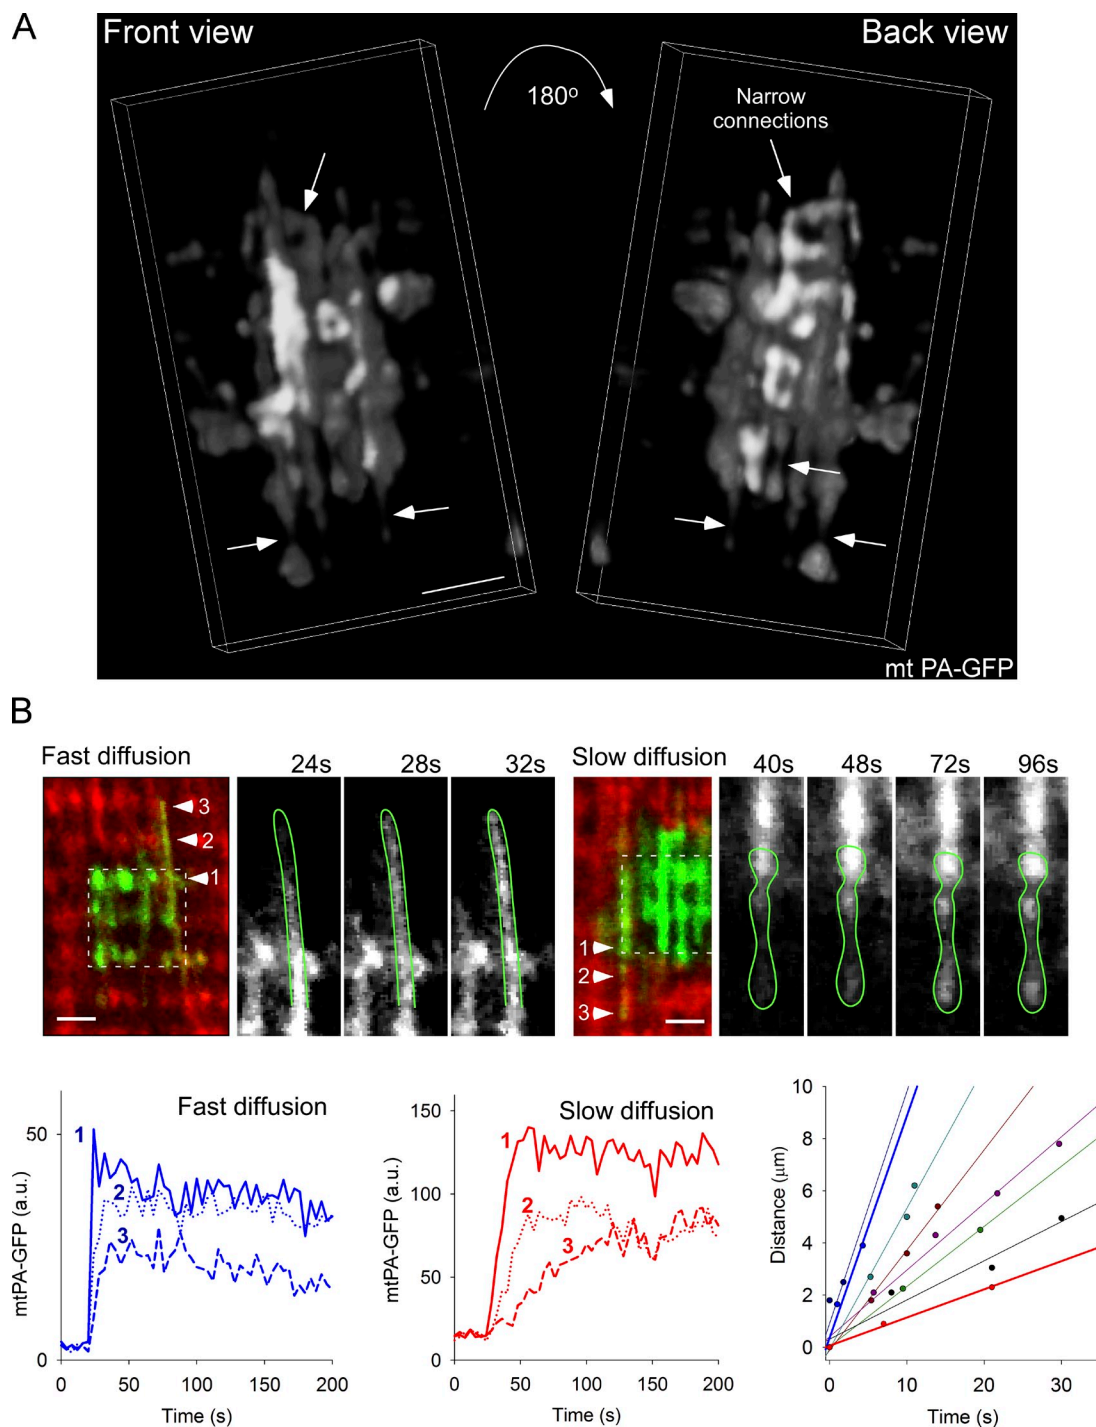

Figure S1. **Mitochondrial continuity in adult skeletal muscle.** (A) Front and back views of 3D reconstruction of the distribution of photoactivated mtPA-GFP in an FDB fiber show complex interconnected mitochondria with examples of transversal and longitudinal continuity. Both longitudinal and transversal matrix connections are illustrated; several connectors appear as narrowing intermitochondrial domains (arrows). Bar, 2  $\mu\text{m}$ . (B) Evaluation of mtPA-GFP diffusion kinetics in individual mitochondria of different elongated morphology, outside of the photoactivated area (examples from a single representative experiment out of three repeats). Left panel and plot below (blue traces): example of an elongated mitochondrion with apparent constant diameter and fast mtPA-GFP diffusion kinetics reflected in the essentially synchronous increase in PA-GFP fluorescence at points of different distance (1, 2, and 3) from the photoactivation area. Top right panel and bottom center plot (red traces): an elongated mitochondrion showing a narrowing domain displays slow mtPA-GFP diffusion kinetics. Bottom right: the plot shows the diverse diffusion kinetics of eight longitudinal oriented organelles (half-time of fluorescence increase vs. distance from the edge of the photoactivation area and linear fits to the data points).

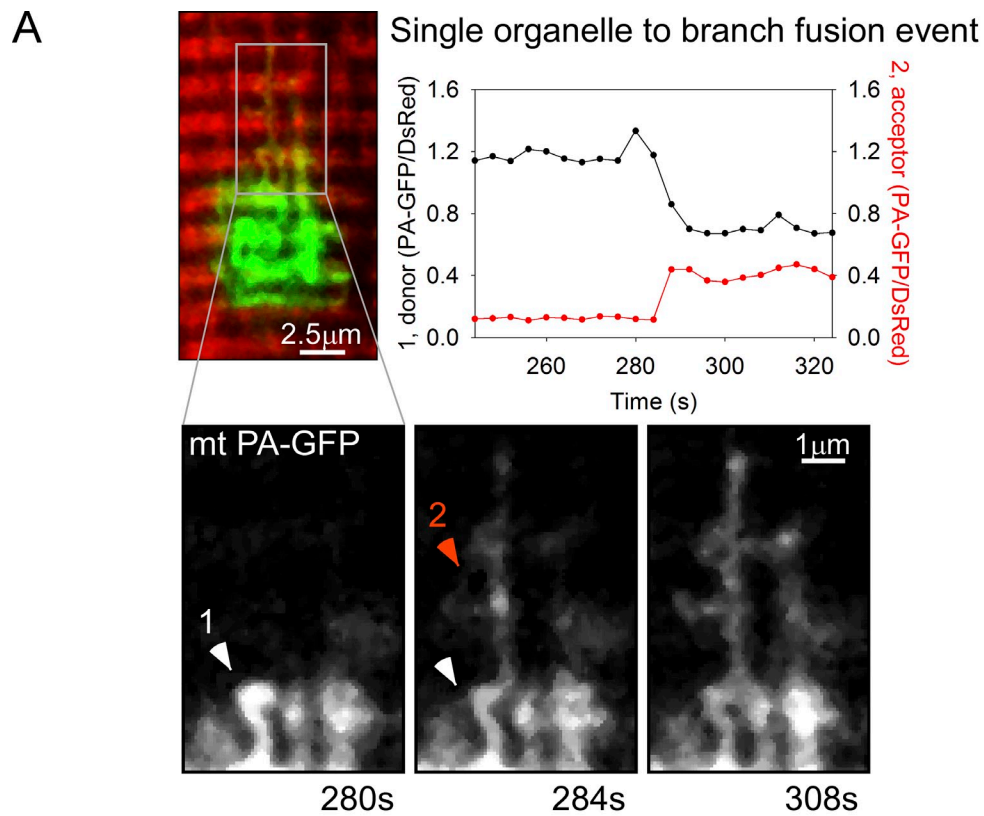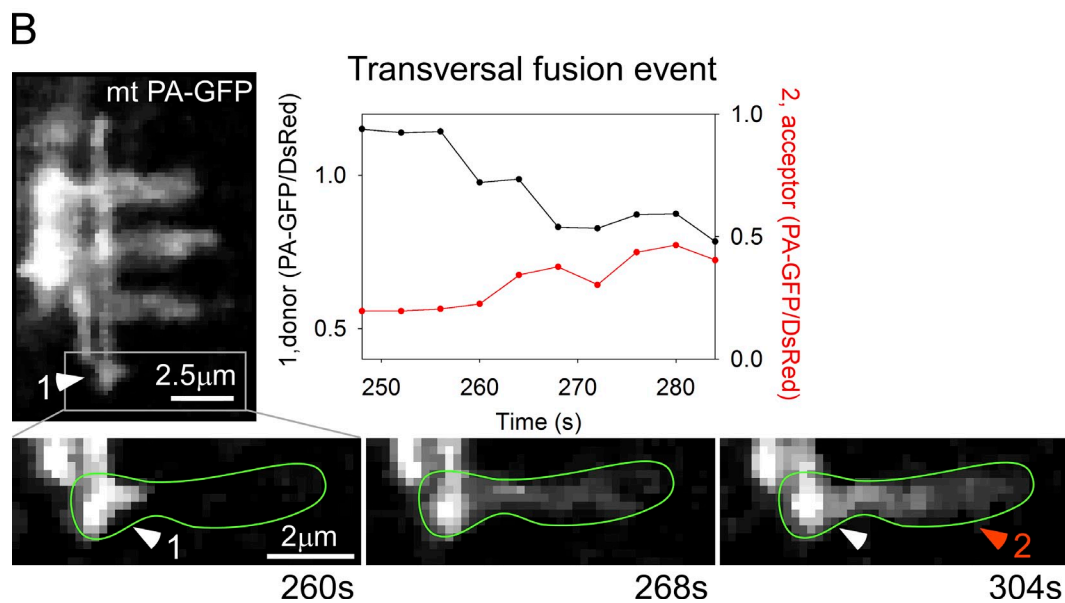

Figure S2. **Diversity of mitochondrial fusion events in adult FDB fibers.** (A) Example of a single mitochondrion to network fusion event. Mitochondrion 1, located in the immediate vicinity of the photoactivation area (left; bar, 2.5  $\mu\text{m}$ ) fuses with mitochondrion 2, a large complex mitochondrion that displays extensive branching in both longitudinal and transversal directions. The graph shows the ratio of mtPA-GFP/mtDsRed at different time points for mitochondrion 1 (PA-GFP donor) and 2 (acceptor) to illustrate the complementary redistribution of the two fluorescent proteins. (B) Example of a transversal fusion event. Mitochondrion 1 adjacent to the photoactivation area (top; bar, 2.5  $\mu\text{m}$ ) fuses with mitochondrion 2; mtPA-GFP diffuses in transversal direction, unveiling a new interconnected organelle (highlighted by green outline). Graph shows mtPA-GFP/mtDsRed ratio for each organelle.

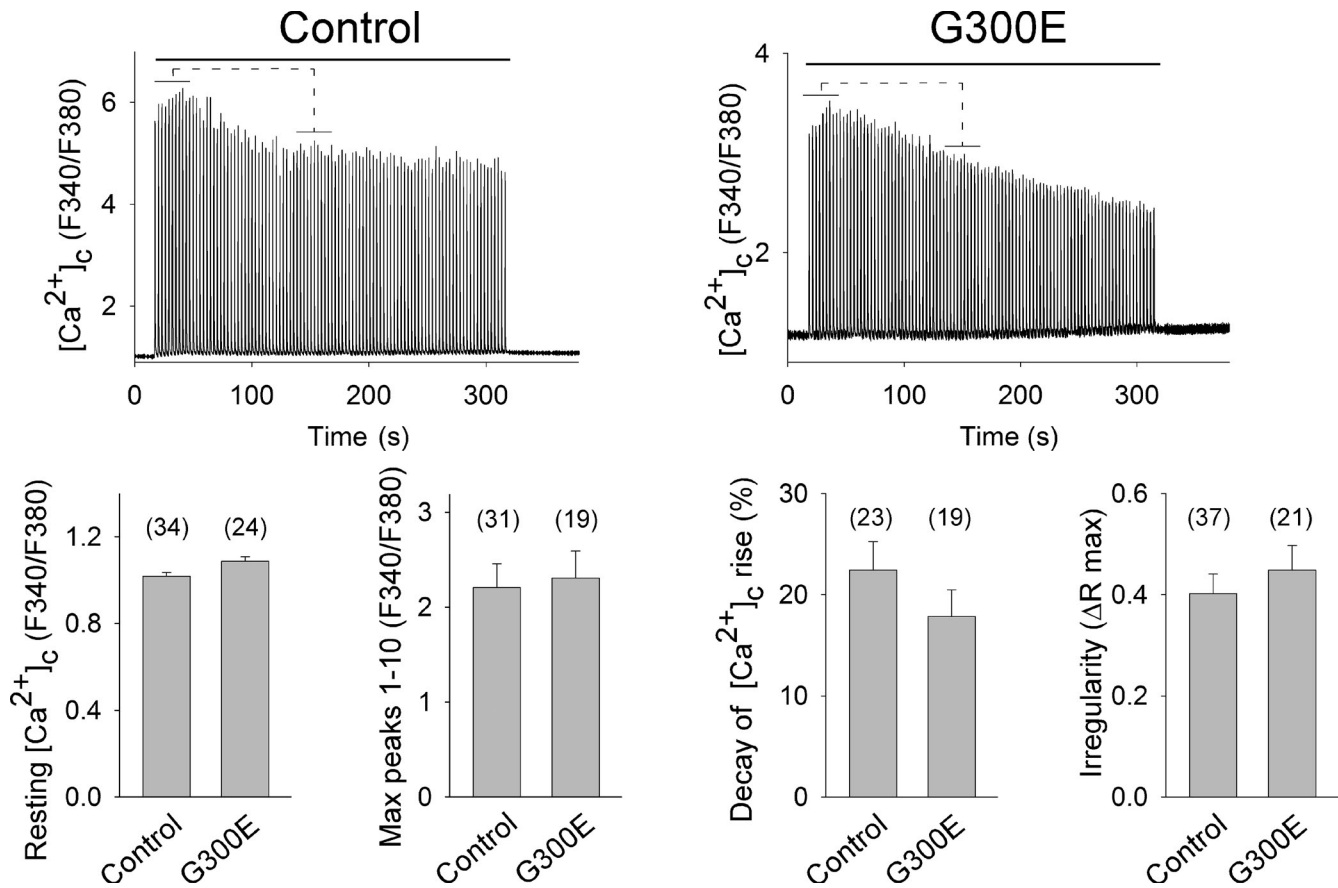

Figure S3. **Short-term expression of Opa1 G300E does not alter trains of  $[Ca^{2+}]_c$  transients in skeletal muscle fibers.** FDB muscles from control animals were cotransfected with mtDsRed and mock or G300E Opa1 cDNA. After 7–10 d, fibers were isolated and loaded with Fura2. mtDsRed-positive fibers that responded to single electric pulses were picked for each experiment. Fibers were challenged by tetanic electrical stimulation. Top panel displays representative  $[Ca^{2+}]_c$  transients. Bottom bar charts show from left to right:  $[Ca^{2+}]_c$  levels preES, max amplitude (peaks 1–10), evaluation of the  $[Ca^{2+}]_c$  transients amplitude decay, for the time period indicated by brackets above the representative traces ( $[(\text{mean peaks 1–10}) - (\text{mean peaks 30–40})] / [(\text{mean peaks 1–10}) \times 100]$ ), and irregularity in amplitude of the  $[Ca^{2+}]_c$  transients  $[(\text{max} - \text{min}) / (\text{max})]$ , among peaks 1–100 (four or more independent experiments, the number of fibers is shown in the bar charts).

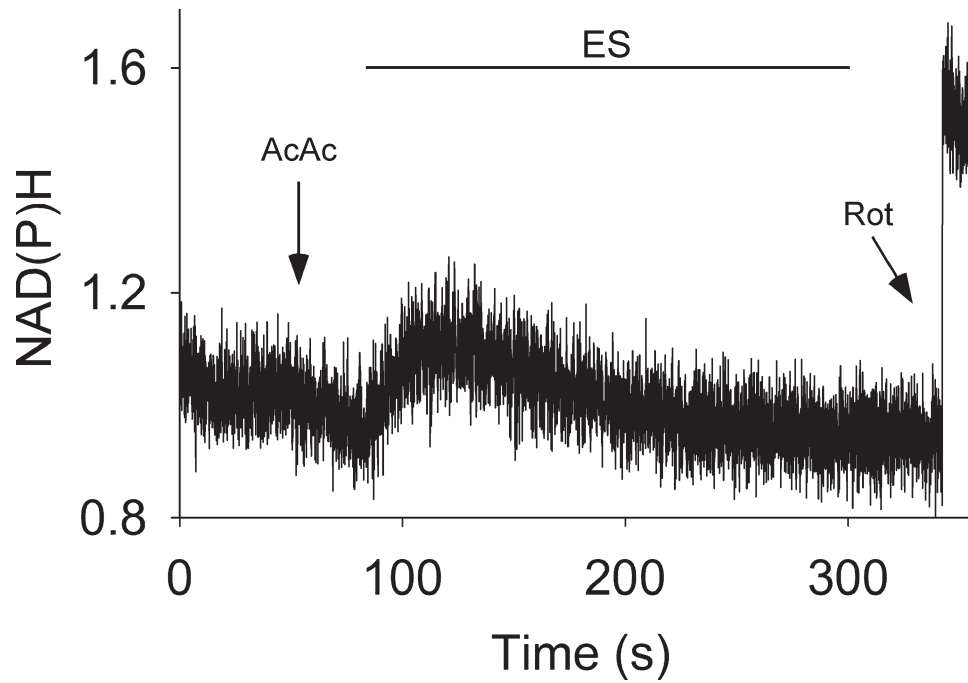

Figure S4. **Representative NADH transient induced by repetitive tetanic stimulation of a FDB fiber that does not express cytoRCaMP.** This experiment was completed with  $n = 3$  fibers. The fiber responded to each tetanus with slight contraction that did not affect the NADH autofluorescence quantification. AcAc, acetoacetate; Rot, rotenone.

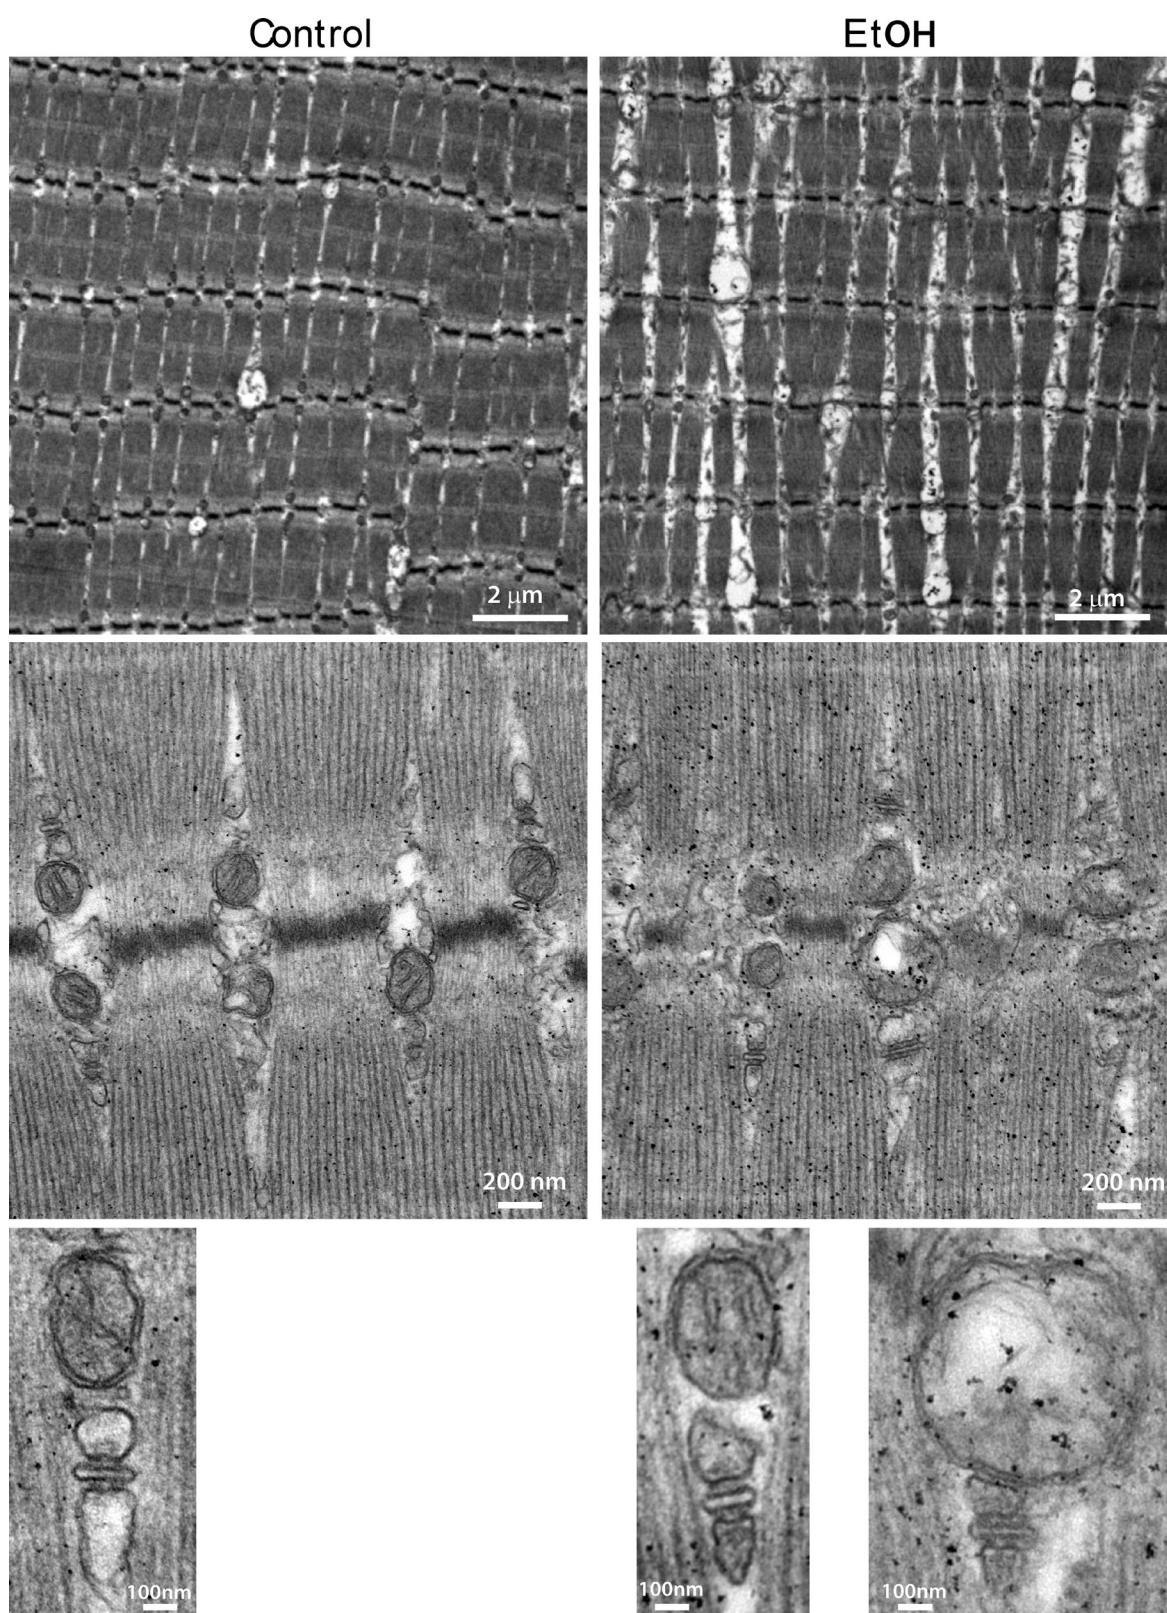

Figure S5. TEM representative images of longitudinal sections of FDB muscles from control and EtOH-fed paired rats. Top: 1,650x; middle: 21,000x; bottom: digital zoom on triads and associated mitochondria from 21,000x images.

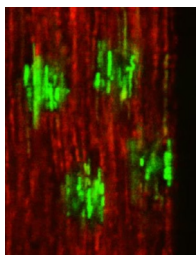

Video 1. **Mitochondrial matrix dynamics in an adult FDB fiber.** Single fiber was isolated from rat FDB skeletal muscle transfected in vivo with mtDsRed and mtPA-GFP. Four regions of  $5 \times 5 \mu\text{m}^2$  were exposed to 2P photoactivation and time-lapse imaged for a total time of 8 min using a laser-scanning confocal microscope (LSM780MP; Carl Zeiss). Frames were taken every 4 s.

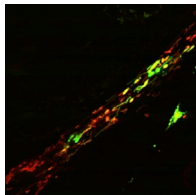

Video 2. **Mitochondrial matrix dynamics in a rat myotube.** FDB fibers plated onto polylysine-coated (Sigma-Aldrich) and laminin-coated (Invitrogen) coverslips ( $100 \mu\text{g}/\text{ml}$  each;  $\sim 20$  coverslips/rat). Satellite cells were infected with the adenoviruses AdmtDsRed and AdmtPA-GFP and were allowed to differentiate to myotubes. Two regions of  $5 \times 5 \mu\text{m}^2$  were exposed to 2P photoactivation and recorded for 8 min using a laser-scanning confocal microscope (LSM780MP; Carl Zeiss). Frames were taken every 4 s.
